# Supplementary material for: Impact of Employment Status and Occupations on the Awareness of Orofacial Pain. A Cross-Sectional Survey Study
Source: Research Square preprint supplement (doi:10.21203/rs.3.rs-7520523/v1), 2025-10-22
Supplement: Supplementary file 1 [file e1074dedc092bc63ef0b0102.docx]

**Supplemental File 1.** Comparison of percentage distribution of employed individuals between our sample cohort and national data of the [Country’s name omitted for peer review] population ([Report’s name omitted for peer review]).

| **[Reference omitted for peer review] divisions** | **Our sample** | | **All India** | | **Prevalence Ratio (PR)*** | |
| --- | --- | --- | --- | --- | --- | --- |
| **Females** | **Males** | **Females** | **Males** | **Females** | **Males** |
| 1. Legislators, senior officials, and managers | 1.3% | 1.3% | 12.7% | 20.5% | 0.10 | 0.06 |
| 2. Professionals | 11.9% | 26.0% | 14.9% | 10.4% | 0.80 | 2.50 |
| 3. Technicians and associate professionals | 5.0% | 19.3% | 15.7% | 8.6% | 0.32 | 2.24 |
| 4. Clerks | 0.0% | 0.0% | 5.3% | 5.2% | 0.0 | 0.0 |
| 5. Service workers and shop and marker sales workers | 59.1% | 0.7% | 19.3% | 23.6% | 3.06 | 0.03 |
| 6. Skilled agricultural and fishery workers | 0.0% | 20.0% | 52.0% | 44.3% | 0.0 | 0.45 |
| 7. Craft and related trades workers | 0.0% | 0.0% | 23.3% | 28.8% | 0.0 | 0.0 |
| 8. Plant and machinery operators and assemblers | 0.0% | 0.7% | 16.7% | 2.4% | 0.0 | 0.29 |
| 9. Elementary occupations | 0.0% | 4.7% | 54.5% | 41.7% | 0.0 | 0.11 |
| 10. Workers not classified by occupations | 6.9% | 7.3% | -- | -- | n/a | n/a |

*PR >1 indicates higher proportion of females in your sample cohort compared to the Indian population for that occupational divisions, while PR <1 indicates a lower proportion of females in our sample compared to the Indian population. PR of 0 identifies no females in our sample cohort for that occupational category.
